# Supplementary material for: The SOS response-associated peptidase (SRAP) domain of YedK catalyzes ring opening of abasic sites and reversal of its DNA–protein cross-link
Source: PubMed Central journal article supplement (PMC9436759; doi:10.1016/j.jbc.2022.102307), 2022-08-05
Supplement: mmc1.pdf [file mmc1.pdf]

## **Supporting Information**

### **The SOS response-associated peptidase (SRAP) domain of YedK catalyzes ring opening of abasic sites and reversal of its DNA-protein crosslink**

Katherine A. Paulin<sup>1</sup>, David Cortez<sup>2</sup>, and Brandt F. Eichman<sup>1,2,\*</sup>

<sup>1</sup> Department of Biological Sciences, Vanderbilt University, Nashville, TN 37232 USA

<sup>2</sup> Department of Biochemistry, Vanderbilt University School of Medicine, Nashville, TN 37232 USA

## Supporting Methods

*ESI-MS of YedK mutants.* High resolution mass spectra were acquired using a Thermo XEactive quadrupole/orbitrap mass spectrometer equipped with an *Ion Max* heated electrospray ion source. The instrument was calibrated weekly over a mass range of  $m/z$  195 to  $m/z$  1922 using the manufacturer's recommended calibration procedure. The MS ion source was operated in positive ion mode using the following ESI parameters: sheath gas ( $N_2$ ) 40; auxiliary gas ( $N_2$ ) 10; capillary temp 320 °C; spray voltage 4.0 kV, auxiliary gas temp 200 °C. The mass analyzer was operated at a resolving power of 120,000 (set at 200  $m/z$ ). Mass spectra were acquired over a mass range of  $m/z$  500 - 2000 with an AGC target of  $3.0 \times 10^6$  and a maximum inject time of 200 ms. Exact masses of intact proteins were calculated from the most intense  $^{13}C$ -isotopologues (M+16) of the most intense charge state envelopes using the following expression:  $m/z = [M + 16 (1.0034) + z(1.0073)] / z$ . Data collection and processing were performed using XCalibur v. 4.1 and Exactive Tune v.2.9. The mass spectrometer was interfaced with a Vanquish Horizon ultra-high performance LC system (Thermo) consisting of a binary pump, refrigerated autosampler, and a thermostated column heater. Intact proteins were chromatographically resolved at room temperature using a Waters Symmetry Shield 300™ C18 reverse phase column (3.5  $\mu m$ , 2.1  $\times$  100 mm) operating at 300  $\mu l/min$ . Mobile phases consisted of 0.05% TFA (v/v) and 0.2% formic acid (v/v) in solution A ( $H_2O/CH_3CN$ , 90:10) and in solution B (2-Propanol/ $CH_3CN/H_2O$ , 50:40:10). Gradient conditions were 0–2 min, 0% B; 2–8 min, 0–100% B; 8–10 min, 100% B; 10–10.5 min, 100–0% B; 10.5–15 min, 0% B. The injection volumes were 10  $\mu l$ , and the autosampler injection valve and sample injection needle were flushed and washed with a methanol/water solution between each injection.

## Supporting Figures

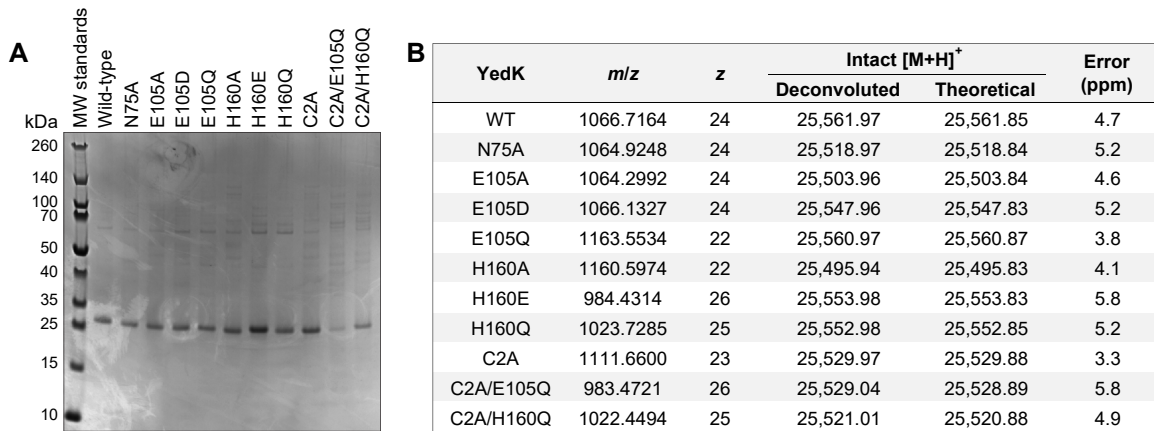

**Figure S1.** Purity and mass analysis of YedK mutant proteins. **A.** Coomassie stained SDS-PAGE gel of purified YedK proteins. **B.** ESI-MS data for purified YedK proteins. Theoretical masses were calculated without Met1. Detailed protocol is provided under *Supporting Methods*.

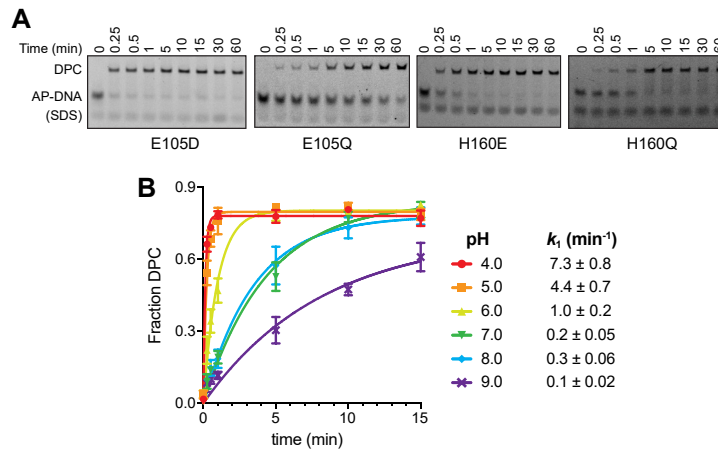

**Figure S2.** **A.** Representative denaturing PAGE gels of AP-DNA crosslinking by YedK point mutants. Bands were visualized by FAM fluorescence. **B.** Kinetics of crosslinking at different pH (mean ± SD, n=3). Reactions were performed at 18 °C. Rate constants derived from exponential fits to the curves are shown on the right and plotted in Fig. 1G.

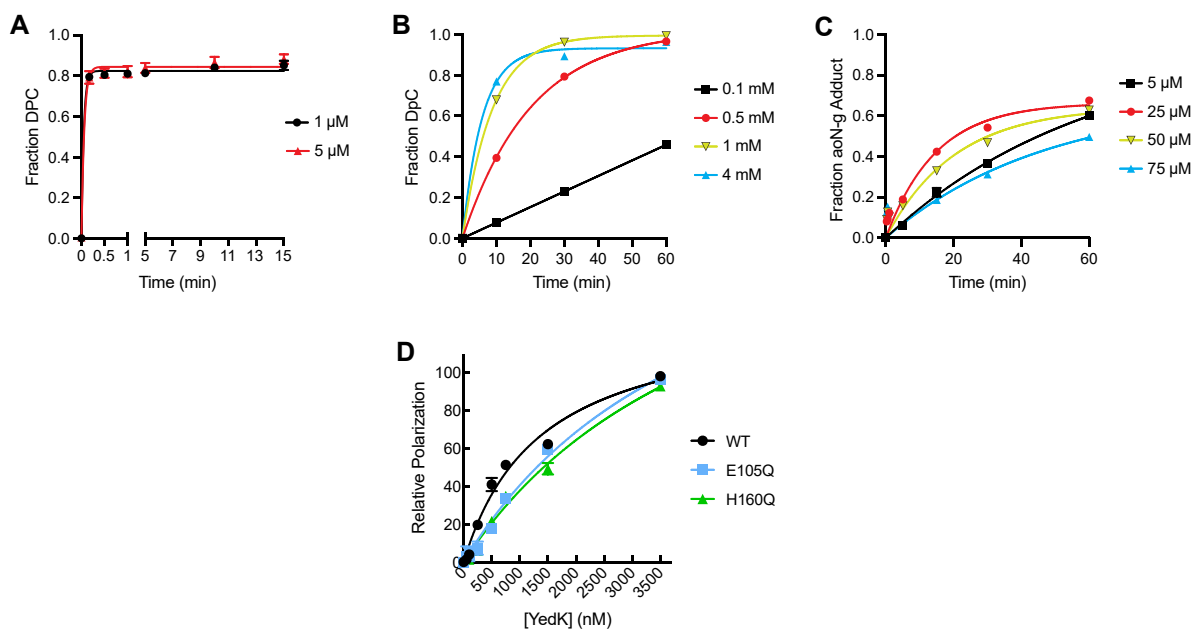

**Figure S3. A-C.** Determination of saturating conditions for crosslink formation using increasing concentrations of (A) YedK, (B) YedK peptide, and (C) aoN-g probe. **D.** Binding of formaldehyde-blocked YedK to ssDNA containing a 5'-FAM label and a centrally located tetrahydrofuran (THF) abasic site analog. Binding was monitored by a change in fluorescence polarization as protein was titrated against DNA. Dissociation constants ( $K_d$ ) derived from non-linear least squares fit of the data are  $1.4 \mu\text{M} \pm 0.007$  (WT),  $4.5 \pm 0.02$  (E105Q), and  $4.9 \pm 0.02$  (H160Q).

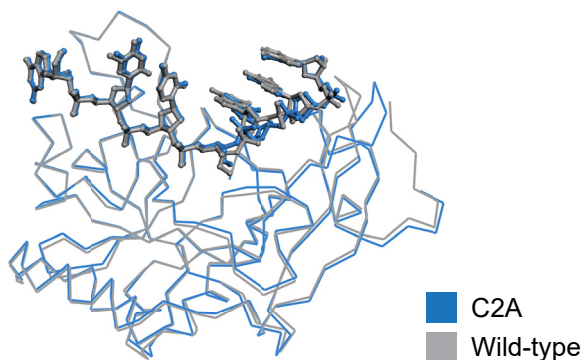

**Figure S4.** Superposition of YedK C2A trapped Schiff base (blue) and wild-type DPC (grey, PDB ID 6NUA) crystal structures.

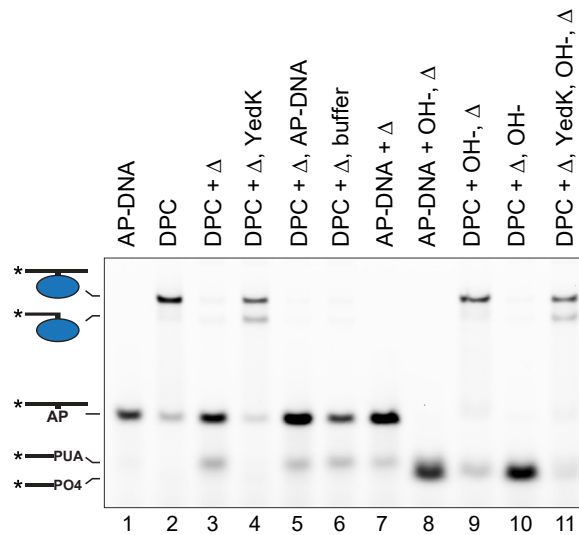

**Figure S5.** YedK DPC is refractory to strand breakage by alkaline pH. AP-DNA or DPC were reacted with hydroxide and heat ( $\Delta$ ) in the orders shown. Lanes 1-7 show that YedK DPC abolished after boiling can be re-formed with addition of fresh YedK but not DNA or buffer. Lanes 8-11 show that YedK DPC is refractory to cleavage by sodium hydroxide. DNA bands were visualized with FAM fluorescence. A cropped version of this gel containing lanes 1-7 is shown in Fig. 5A.

## Supporting Tables

**Table S1.** YedK mutant crosslinking rates <sup>a</sup>

| YedK mutant     | $k_1$ (min <sup>-1</sup> ) | $k_2$ (min <sup>-1</sup> ) | Fold change (relative to WT) |
|-----------------|----------------------------|----------------------------|------------------------------|
| WT <sup>b</sup> | $\geq 10.3 \pm 1.6$        |                            | 1                            |
| N75A            | $7.1 \pm 1.5$              |                            | 0.7                          |
| E105A           | $4.1 \pm 2.1$              | $0.01 \pm 0.01$            | 0.4   0.001                  |
| E105D           | $6.3 \pm 0.7$              |                            | 0.6                          |
| E105Q           | $1.2 \pm 0.7$              | $0.02 \pm 0.02$            | 0.1   0.002                  |
| H160A           | $1.1 \pm 0.1$              |                            | 0.1                          |
| H160E           | $3.5 \pm 1.1$              |                            | 0.3                          |
| H160Q           | $0.9 \pm 0.1$              |                            | 0.1                          |

<sup>a</sup> Reactions were carried out at pH 6.0, 25 °C. Values are mean  $\pm$  SD (n=3)

<sup>b</sup> Value for wild-type is a lower limit

**Table S2.** Sequences of oligodeoxynucleotides used

| Name       | Sequence (5'→3')                             | Figure(s)                |
|------------|----------------------------------------------|--------------------------|
| FAM_U_Cy5  | FAM-d(CGGGCGGCGGCAUAGGGCGCGGGCCTTTTTT)-Cy5   | 1B-G, 3E-F               |
| FAM_U_20   | FAM-d(TCTTCTGGTCUGGATGGTAGT)                 | 5B-D                     |
| 40_U       | d(GGAATCTGACTCTTCTGGTCUGGATGGTAGTTAAGTCTTGT) | 5B-D                     |
| FAM_U_35   | FAM-d(ATGACTCTTCTGGTCUGGATGGTAGTTAAGTCTTGT)  | 2A-C, 2E, 4A, 4C, 5A, 5D |
| FAM_THF_15 | FAM-d(TCTGGTC[THF]GGATGGT)                   | S2D                      |
| H36        | d(GTCUGGA)                                   | 3B-C                     |

**Table S3.** X-ray data collection and refinement statistics for YedK C2A DPC <sup>a</sup>**Data collection**

|                                           |                            |
|-------------------------------------------|----------------------------|
| Space group                               | <i>P</i> 2 <sub>1</sub>    |
| Cell dimensions                           |                            |
| <i>a</i> , <i>b</i> , <i>c</i> (Å)        | 60.94 41.47 82.58          |
| $\alpha$ , $\beta$ , $\gamma$ (°)         | 90.00, 95.65, 90.00        |
| Resolution (Å)                            | 50.00 - 1.83 (1.90 - 1.83) |
| <i>R</i> <sub>sym</sub>                   | 0.076 (0.667)              |
| <i>R</i> <sub>meas</sub>                  | 0.101 (0.891)              |
| CC <sub>1/2</sub>                         | 0.994 (0.507)              |
| Avg. <i>I</i> / $\sigma$ <i>I</i>         | 11.9 (1.4)                 |
| Completeness (%)                          | 99.53 (96.06)              |
| Redundancy                                | 2.1 (2.1)                  |
| Wilson <i>B</i> -factor (Å <sup>2</sup> ) | 19.8                       |

**Refinement**

|                                                         |                            |
|---------------------------------------------------------|----------------------------|
| Resolution (Å)                                          | 37.03 - 1.82 (1.87 - 1.82) |
| No. reflections                                         | 37,024 (3,583)             |
| <i>R</i> <sub>work</sub>                                | 0.178 (0.254)              |
| <i>R</i> <sub>free</sub> <sup>b</sup>                   | 0.226 (0.307)              |
| No. atoms <sup>c</sup>                                  |                            |
| Protein                                                 | 3,500                      |
| DNA                                                     | 246                        |
| Water                                                   | 260                        |
| Other                                                   | 0                          |
| Avg. <i>B</i> -factors <sup>c,d</sup> (Å <sup>2</sup> ) |                            |
| Protein                                                 | 26.6                       |
| DNA                                                     | 29.4                       |
| Water                                                   | 27.8                       |
| Other                                                   | -                          |
| R.m.s. deviations                                       |                            |
| Bond lengths (Å)                                        | 0.011                      |
| Bond angles (°)                                         | 1.109                      |

<sup>a</sup> Statistics for the highest resolution shell are shown in parentheses.

<sup>b</sup> *R*<sub>free</sub> was determined from the 5% of reflections excluded from refinement.

<sup>c</sup> Riding hydrogen atoms were not included in no. atoms or avg. *B*-factors.

<sup>d</sup> Equivalent isotropic *B*-factors were calculated in conjunction with TLS-derived anisotropic *B*-factors
